# Supplementary material for: Roseabol A, a New Peptaibol from the Fungus Clonostachys rosea
Source: MDPI journal article supplement (doi:10.3390/molecules26123594), 2021-06-11
Supplement: s1 [file s1]

## ***Supplementary data***

### **Roseabol A, a New Peptaibol from the Fungus *Clonostachys rosea***

Chang-Kwon Kim,<sup>1</sup> Lauren R. H. Krumpe,<sup>1,2</sup> Emily Smith,<sup>1,2</sup> Curtis J. Henrich,<sup>1,2</sup> Isaac Brownell,<sup>3</sup>  
Karen L. Wendt,<sup>4</sup> Robert H. Cichewicz,<sup>4</sup> Barry R. O’Keefe,<sup>1,5</sup> and Kirk R. Gustafson<sup>1,\*</sup>

<sup>1</sup> Molecular Targets Program, Center for Cancer Research, National Cancer Institute, Frederick, Maryland 21702-1201, USA; chang-kwon.kim@nih (C.-K.K.); haughl@mail.nih.gov (L.R.H.K.); emily.smith2@nih.gov (E.S.); curtis.henrich2@nih.gov C.J.H.); okeefeba@mail.nih.gov (B.R.O.)

<sup>2</sup> Basic Science Program, Frederick National Laboratory for Cancer Research, Frederick, Maryland, 21702-1201, USA

<sup>3</sup> Dermatology Branch, National Institute of Arthritis and Musculoskeletal and Skin Diseases, Bethesda, Maryland, 20893, USA; isaac.brownell@nih.gov

<sup>4</sup> Natural Products Discovery Group, Department of Chemistry and Biochemistry, University of Oklahoma, Norman, OK, 73019-5251, USA; klwendt@ou.edu (K.L.W.); rhcichewicz@ou.edu (R.H.C.)

<sup>5</sup> Natural Products Branch, Developmental Therapeutics Program, Division of Cancer Treatment and Diagnosis, National Cancer Institute, Frederick, Maryland 21701-1201, USA

## Contents

|                                                                                                  |     |
|--------------------------------------------------------------------------------------------------|-----|
| <b>Figure S1.</b> $^1\text{H}$ NMR (600 MHz, DMSO- $d_6$ ) spectrum of <b>1</b>                  | S3  |
| <b>Figure S2.</b> $^1\text{H}$ NMR (600 MHz, Acetone- $d_5$ ) spectrum of <b>1</b>               | S4  |
| <b>Figure S3.</b> $^{13}\text{C}$ NMR (150 MHz, DMSO- $d_6$ ) spectrum of <b>1</b>               | S5  |
| <b>Figure S4.</b> Edited HSQC NMR (600 MHz, DMSO- $d_6$ ) spectrum of <b>1</b>                   | S6  |
| <b>Figure S5.</b> COSY NMR (600 MHz, DMSO- $d_6$ ) spectrum of <b>1</b>                          | S7  |
| <b>Figure S6.</b> HSQC-TOCSY NMR (600 MHz, DMSO- $d_6$ ) spectrum of <b>1</b>                    | S8  |
| <b>Figure S7.</b> HMBC NMR (600 MHz, DMSO- $d_6$ ) spectrum of <b>1</b>                          | S9  |
| <b>Figure S8.</b> ROESY NMR (600 MHz, DMSO- $d_6$ ) spectrum of <b>1</b>                         | S10 |
| <b>Figure S9.</b> HRESI-MS data for <b>1</b>                                                     | S11 |
| <b>Figure S10.</b> HRESI-MS/MS fragmentations for <b>1</b>                                       | S12 |
| <b>Figure S11.</b> Advanced Marfey's analysis for Iva, Val, and Leuol residues of <b>1</b>       | S13 |
| <b>Figure S12.</b> Advanced Marfey's analysis for <i>trans</i> -Hyp and Leu residues of <b>1</b> | S14 |
| <b>Figure S13.</b> Advanced Marfey's analysis for Ser residue of <b>1</b>                        | S15 |
| <b>Figure S14.</b> Advanced Marfey's analysis for Gln residue of <b>1</b>                        | S16 |
| <b>Figure S15.</b> ECD spectrum of <b>1</b>                                                      | S17 |
| <b>Figure S16.</b> Merkel cell carcinoma cytotoxic activity of compound <b>2</b>                 | S18 |



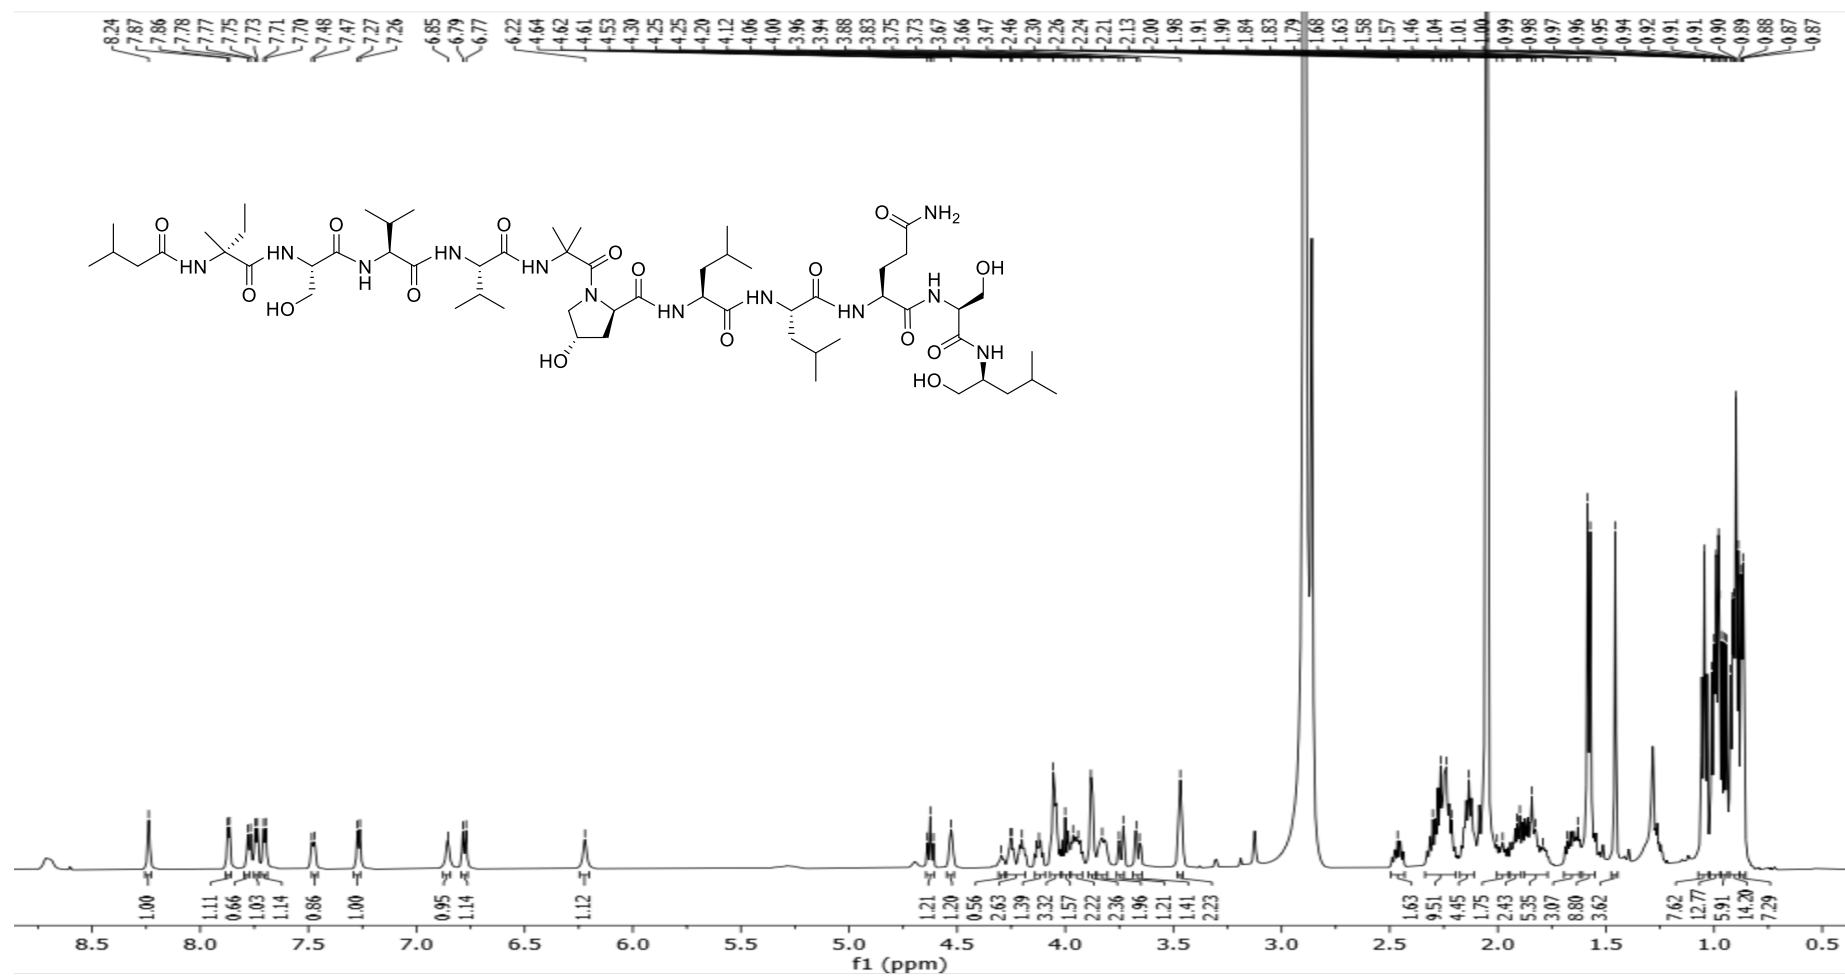

**Figure S2.**  $^1\text{H}$  NMR (600 MHz,  $\text{Acetone-}d_6$ ) spectrum of **1**

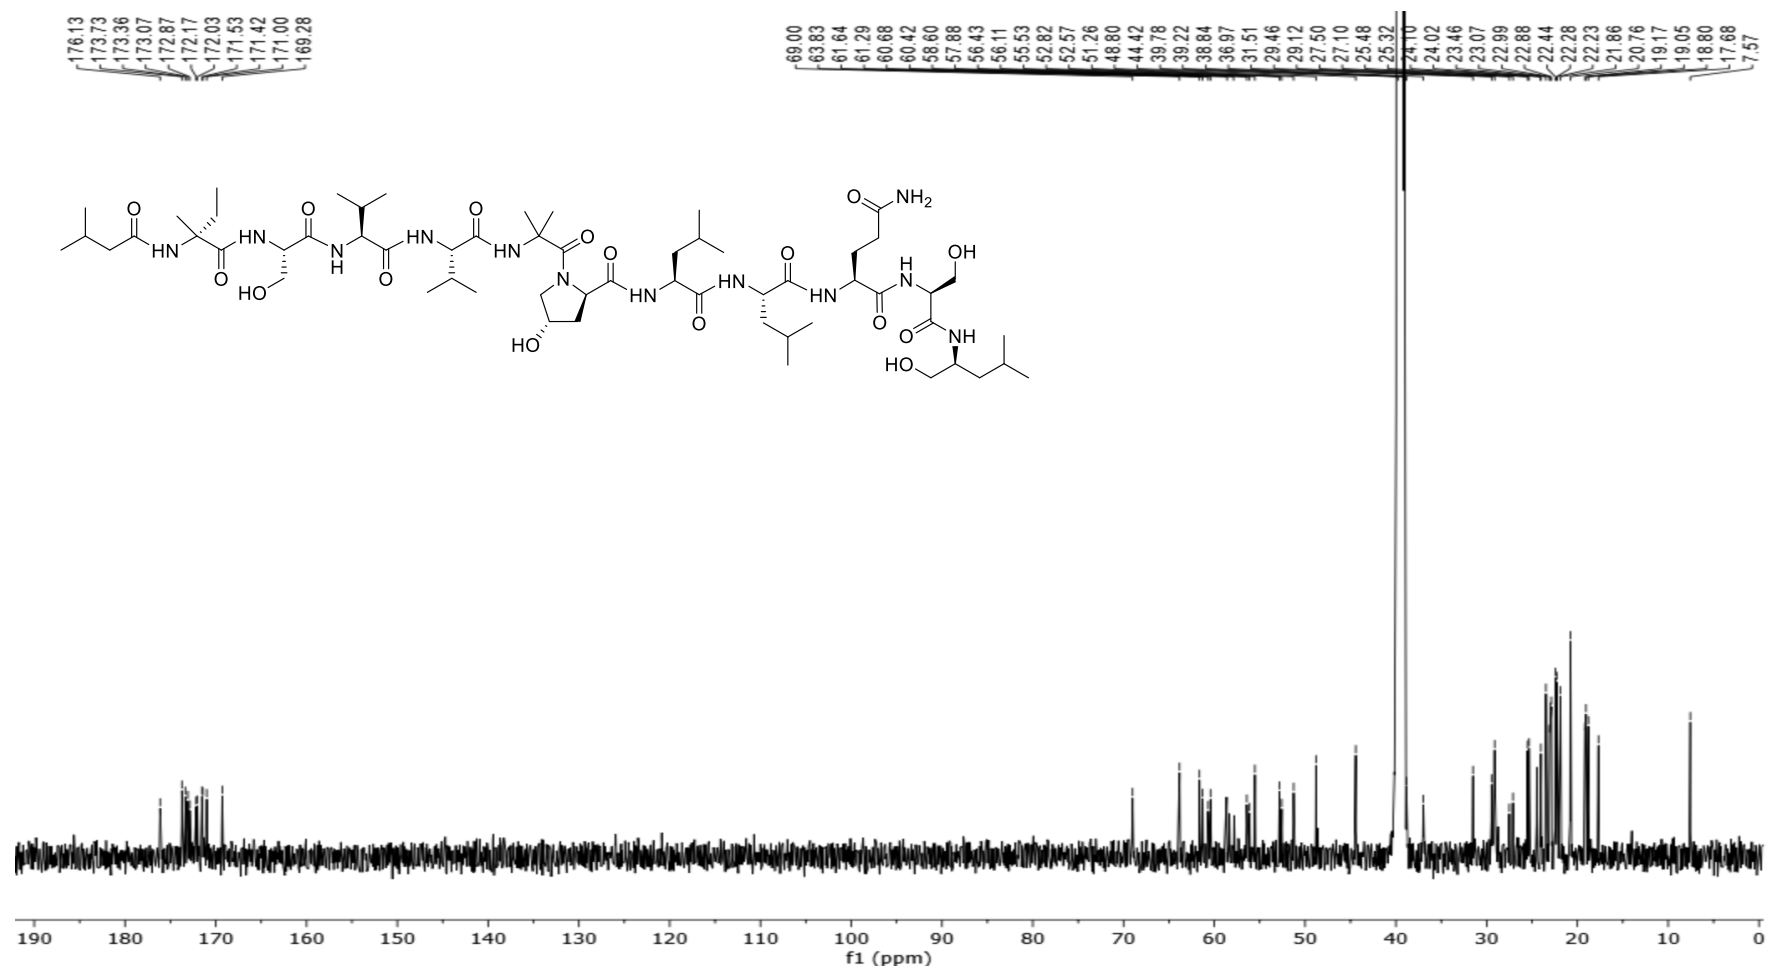

**Figure S3.**  $^{13}\text{C}$  NMR (150 MHz,  $\text{DMSO}-d_6$ ) spectrum of **1**



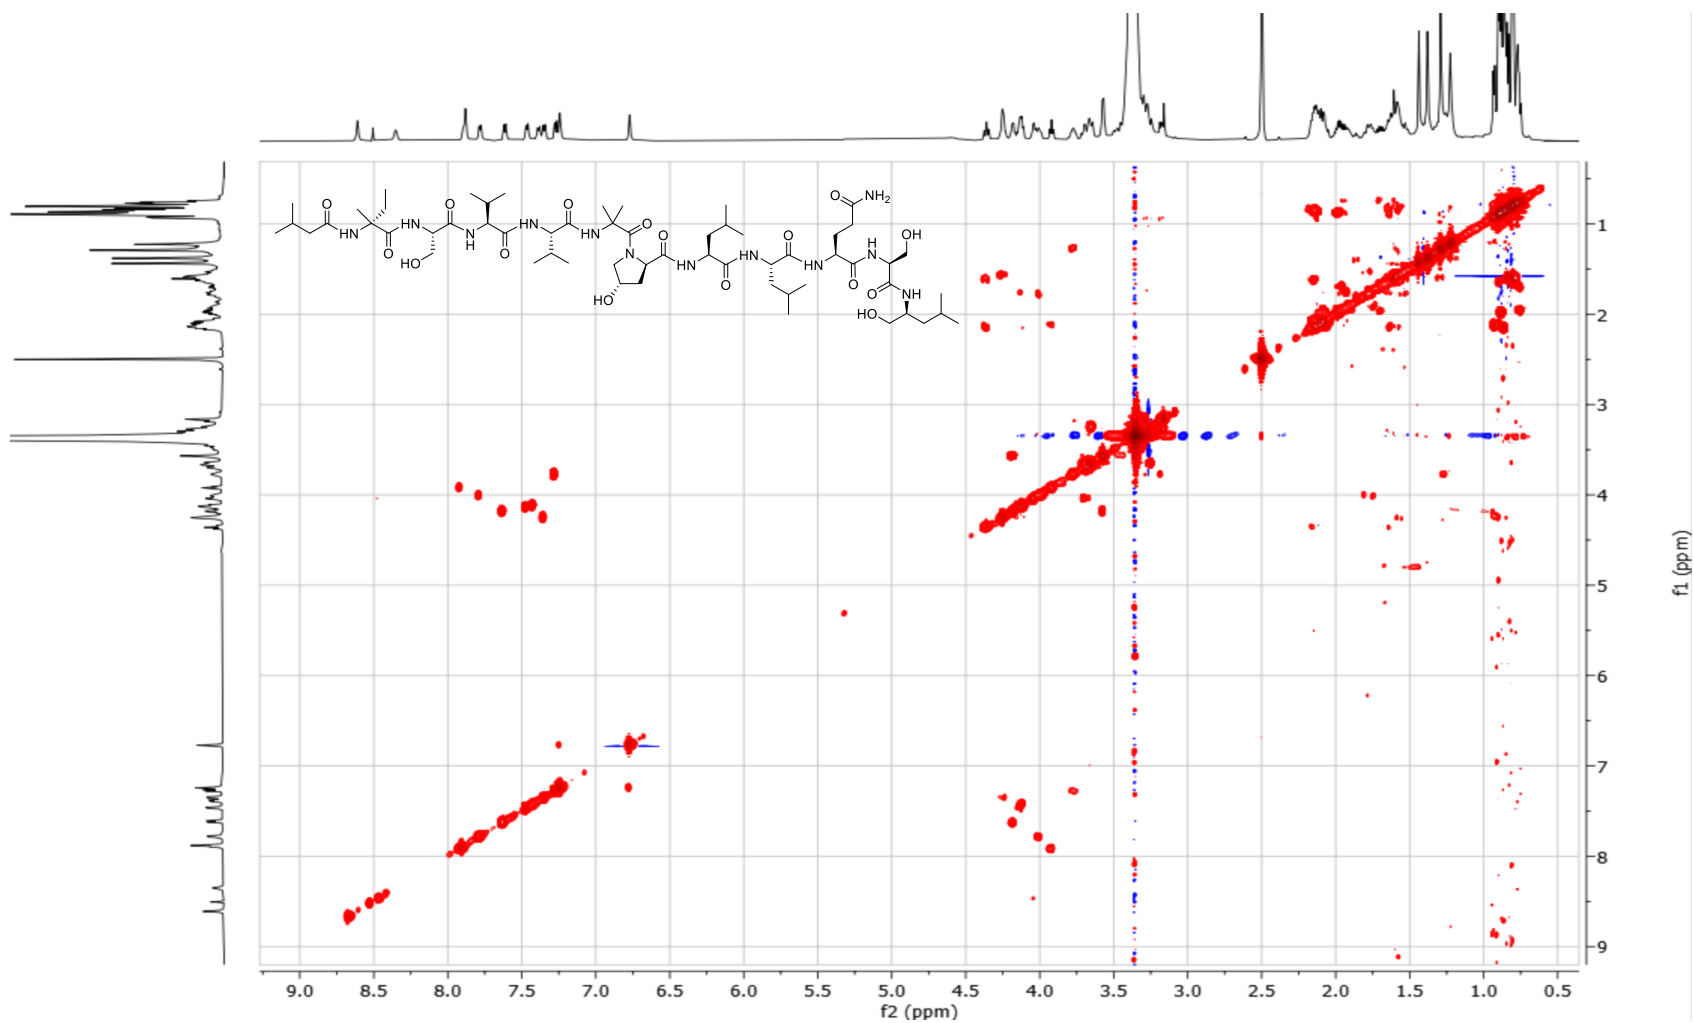

**Figure S5.** COSY NMR (600 MHz, DMSO-*d*<sub>6</sub>) spectrum of **1**

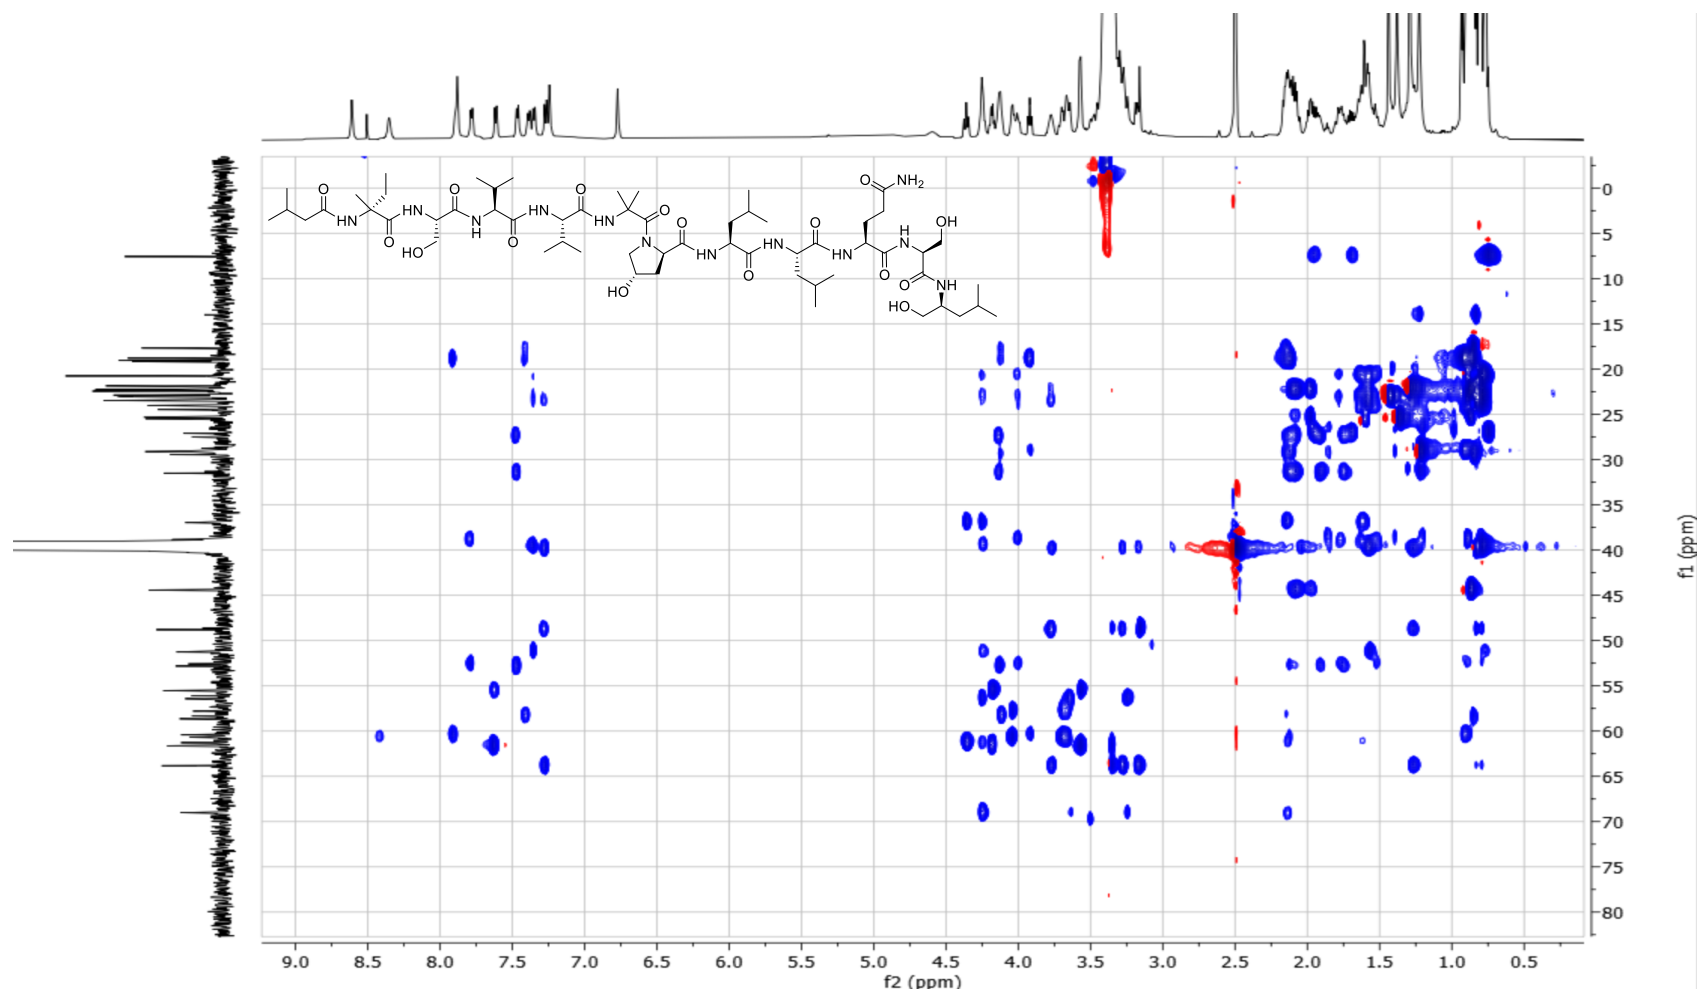

**Figure S6.** HSQC-TOCSY NMR (600 MHz, DMSO- $d_6$ ) spectrum of **1**



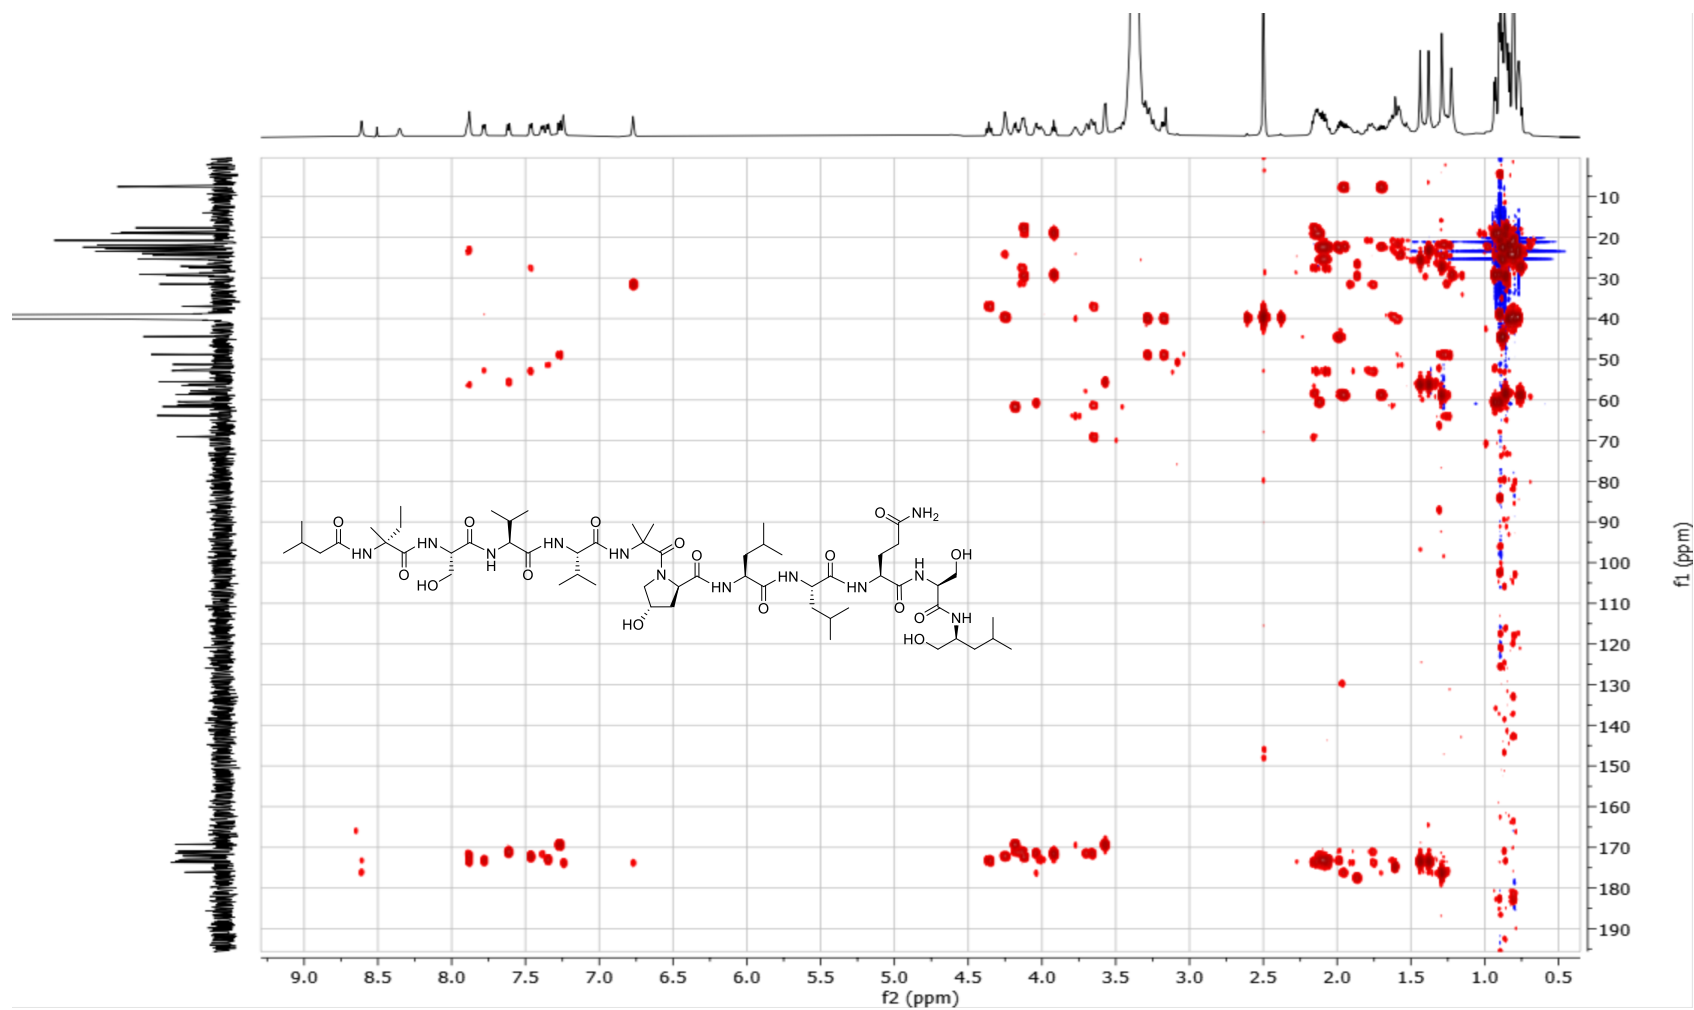

**Figure S7.** HMBC NMR (600 MHz, DMSO-*d*<sub>6</sub>) spectrum of **1**

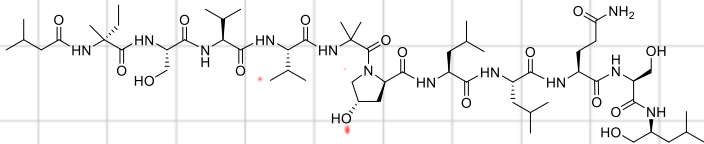

**Figure S8.** ROESY NMR (600 MHz, DMSO-*d*<sub>6</sub>) spectrum of **1**

# Analysis Report

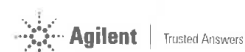

## Sample Information

|                       |              |                           |                                                         |
|-----------------------|--------------|---------------------------|---------------------------------------------------------|
| <b>Name</b>           | 1768170C     | <b>Data File Path</b>     | C:\Users\bokeschh\Desktop\020620\1768170C.d             |
| <b>Sample ID</b>      |              | <b>Acq. Time (Local)</b>  | 2/6/2020 10:45:02 AM (UTC-05:00)                        |
| <b>Instrument</b>     | Instrument 1 | <b>Method Path (Acq)</b>  | C:\Users\admin\Desktop\methods\FIA_SM_LowFlow.m         |
| <b>MS Type</b>        | QTOF         | <b>Version (Acq SW)</b>   | 6200 series TOF/6500 series Q-TOF B.09.00 (B9044.1 SP1) |
| <b>Inj. Vol. (ul)</b> | 1            | <b>IRM Status</b>         | Success                                                 |
| <b>Position</b>       | Vial 1       | <b>Method Path (DA)</b>   |                                                         |
| <b>Plate Pos.</b>     |              | <b>Target Source Path</b> |                                                         |
| <b>Operator</b>       |              | <b>Result Summary</b>     |                                                         |

## Sample Chromatograms

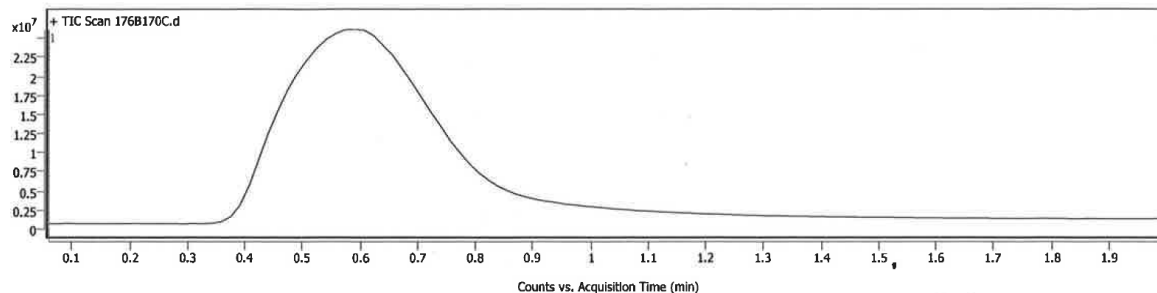

## Sample Spectra

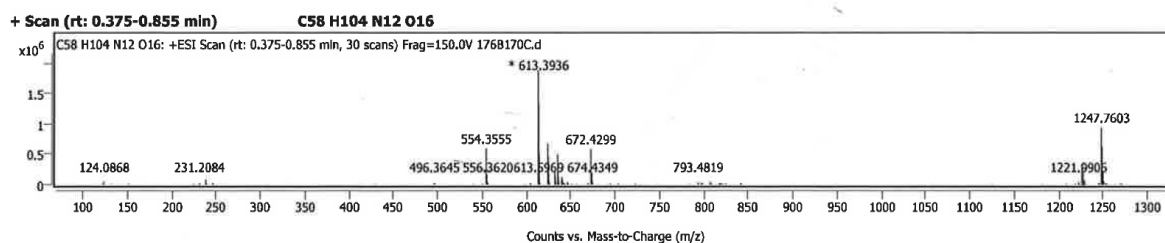

## Spectrum Identification Table

| Best ID Source | Name | Formula          | Species | m/z       | Diff (ppm) | CAS | Score | Score (Lib) | Score (DB) | Score (MFG) | Lib/DB |
|----------------|------|------------------|---------|-----------|------------|-----|-------|-------------|------------|-------------|--------|
| Yes            | MFG  | C58 H104 N12 O16 | (M+H)+  | 1225.7773 | 0.29       |     | 99.30 |             |            | 99.30       |        |

MassHunter Qual 10.0  
(End of Report)

Figure S9. HRESI-MS data for 1

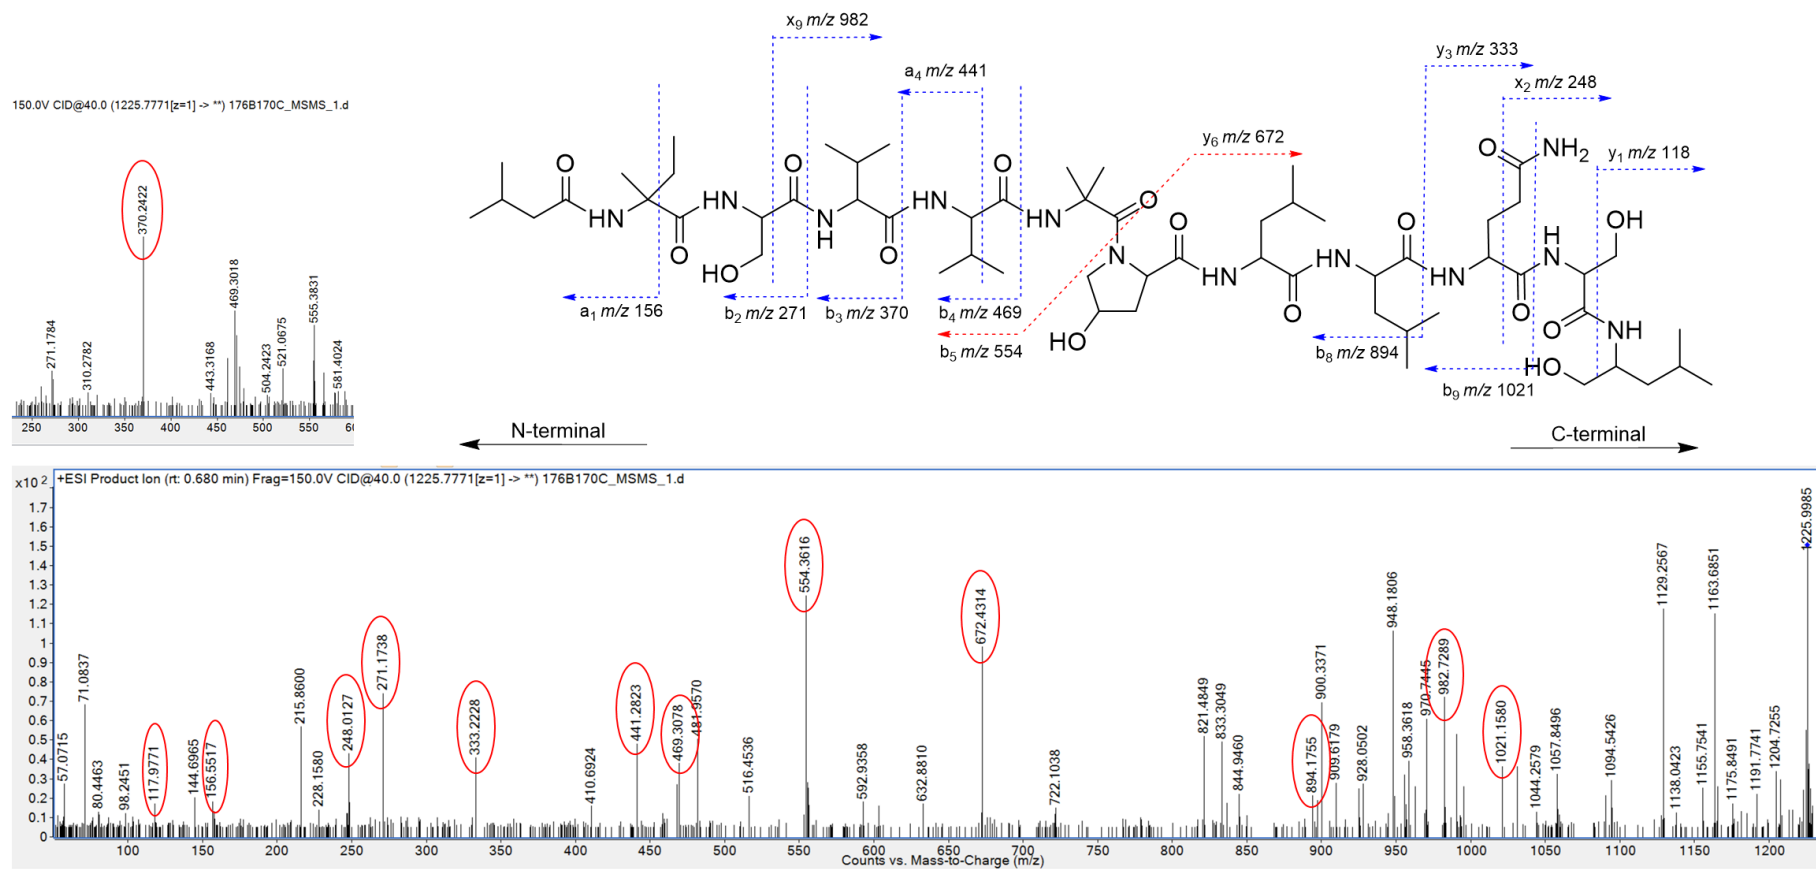

Figure S10. HR ESI-MS/MS fragmentations for **1**

## Advanced Marfey's analysis of **1**

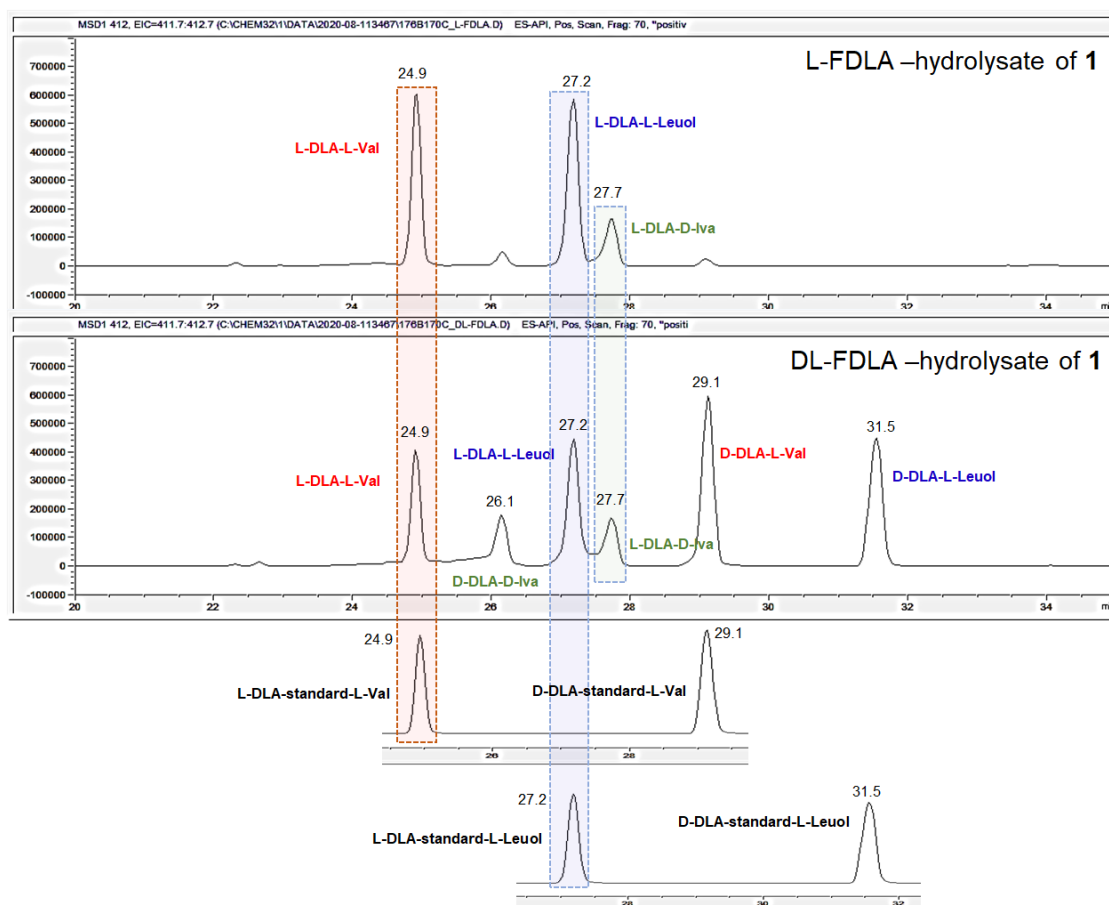

**Figure S11.** Ion chromatograms of the L-FDLA derivatives (top) and the D/L-FDLA derivatives (middle) of the hydrolysis product of **1** and the D/L-FDLA derivatives of the standard L-Val and L-Leuol (bottom) in positive ion mode monitoring at  $m/z$  412 for Iva, Val, and Leuol residues.

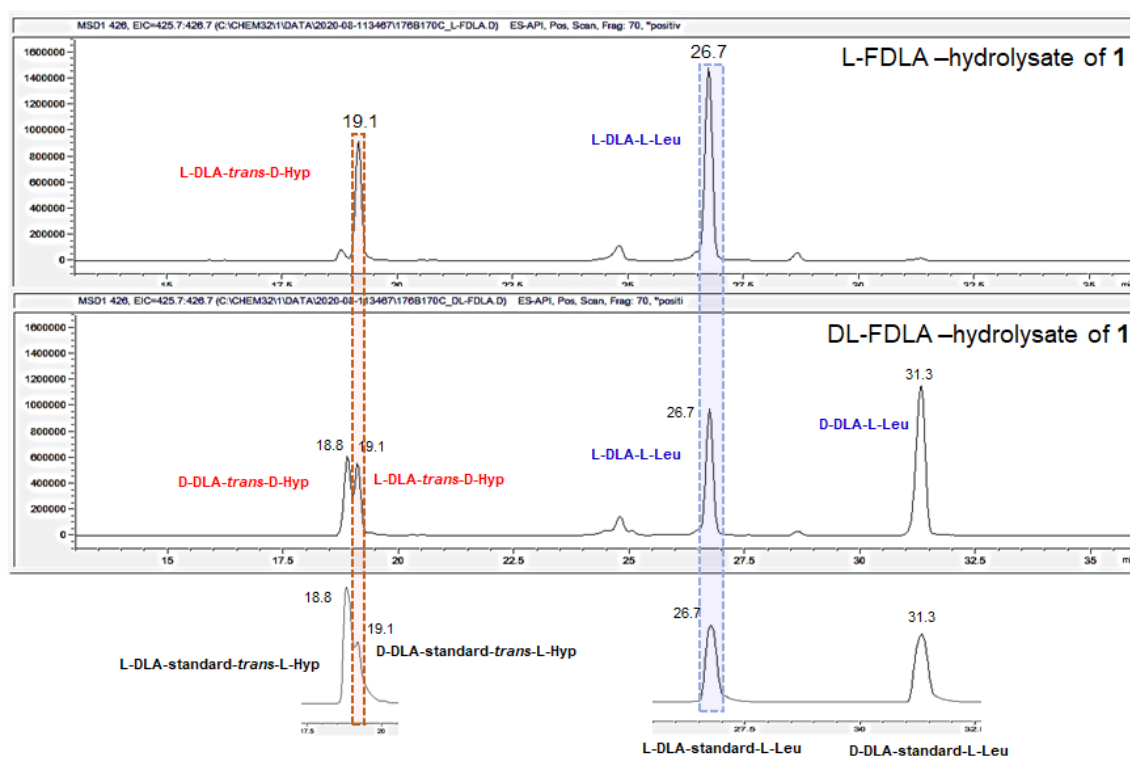

**Figure S12.** Ion chromatograms of the L-FDLA derivatives (top) and the D/L-FDLA derivatives (middle) of the hydrolysis product of **1** and the D/L-FDLA derivatives of the standard *trans*-L-Hyp and L-Leu (bottom) in positive ion mode monitoring at  $m/z$  426 for *trans*-Hyp and Leu residues.

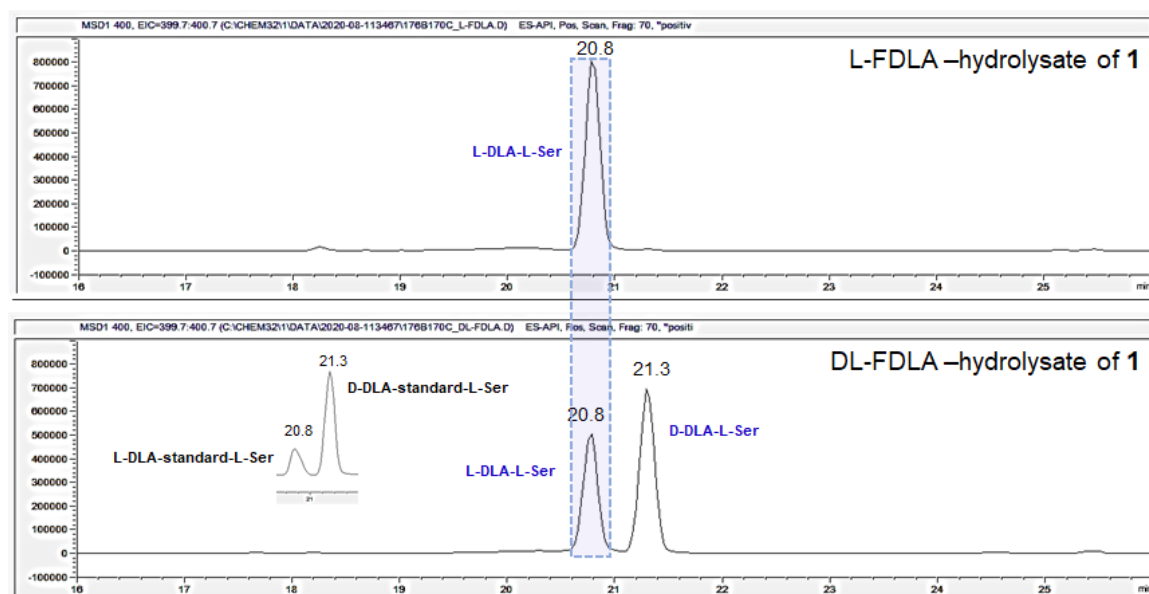

**Figure S13.** Ion chromatograms of the L-FDLA derivatives (top) and the D/L-FDLA derivatives (bottom) of the hydrolysis product of **1** and the D/L-FDLA derivatives of the standard L-Ser in positive ion mode monitoring at  $m/z$  400 for Ser residue.

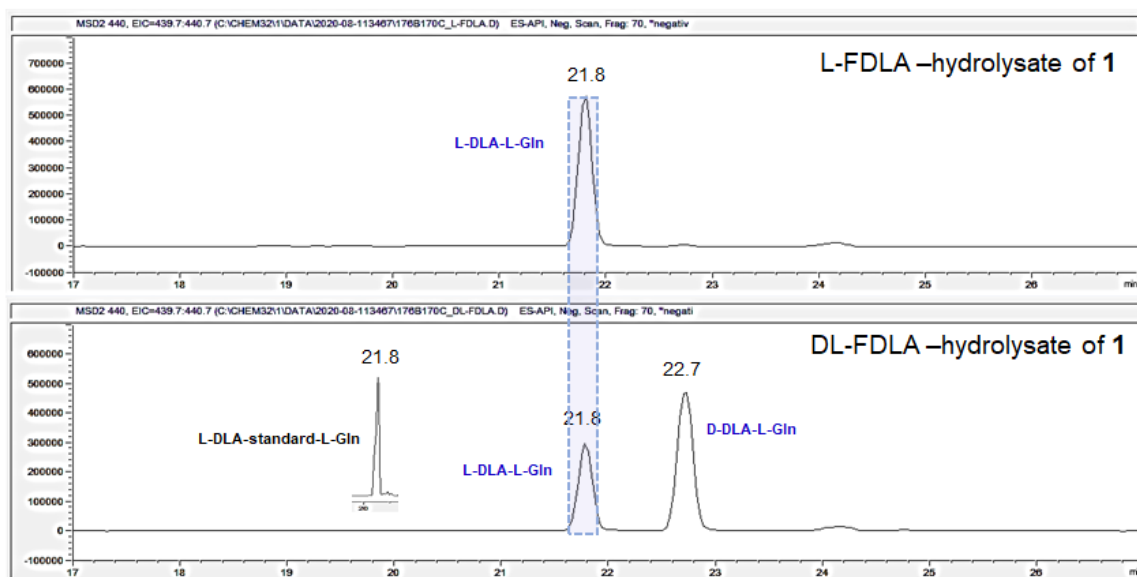

**Figure S14.** Ion chromatograms of the L-FDLA derivatives (top) and the D/L-FDLA derivatives (bottom) of the hydrolysis product of **1** and the D/L-FDLA derivatives of the standard L-Gln in negative ion mode monitoring at  $m/z$  440 for Gln residue.



**Figure S15.** ECD spectrum of roseabol A (**1**)

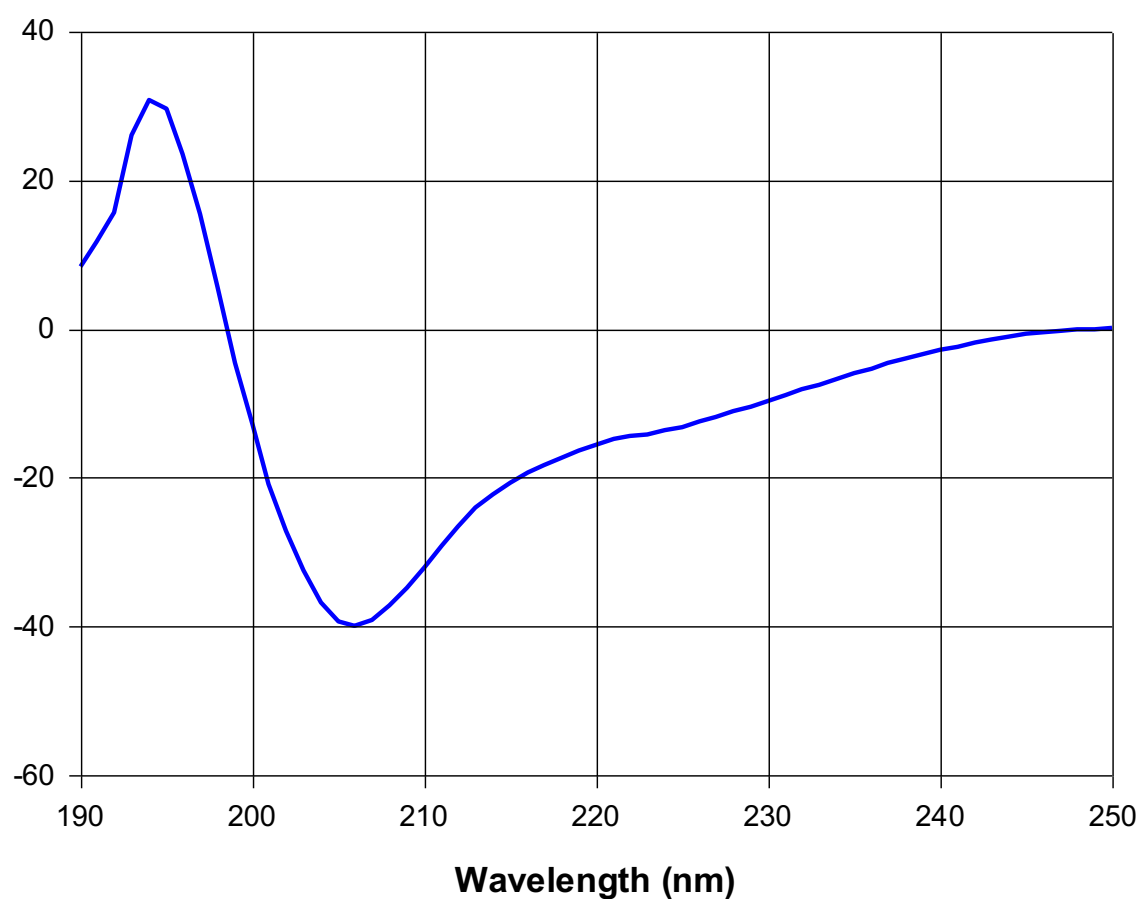

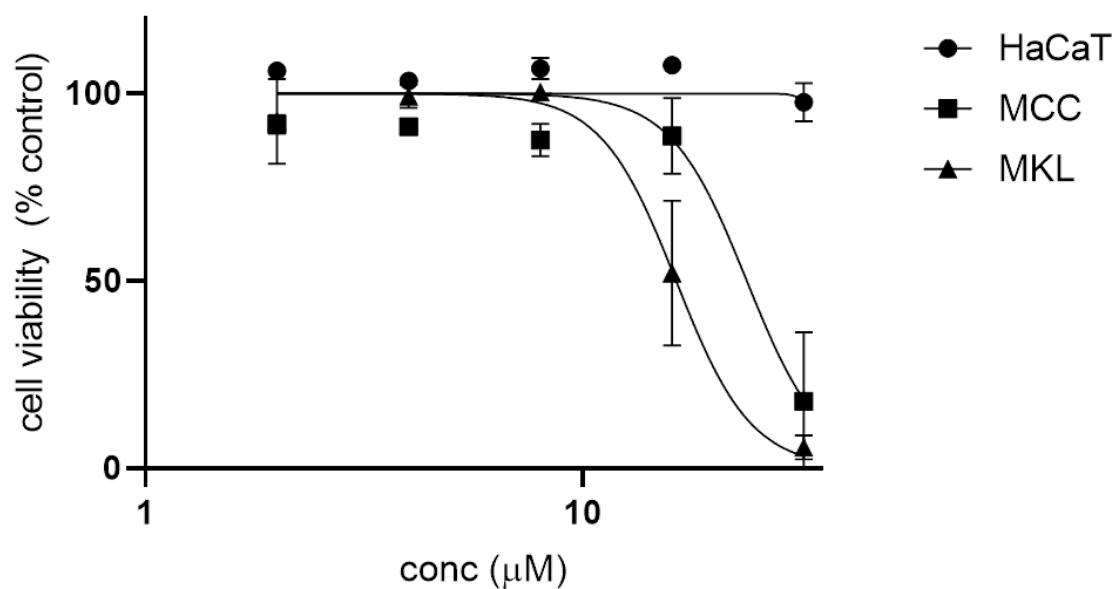

**Figure S16.** Merkel cell carcinoma cytotoxic activity for compound **2** assessed against the MKL-1 (solid triangles) and MCC26 (open circles) cell lines, with HaCaT cells (solid circles) as a noncancerous control. Bortezomib was the positive control with an  $IC_{50}$  of  $13.1 \pm 5.8$  nM for the three cell lines. Samples were tested in duplicate and the compound purity was assessed as  $> 90\%$  by HPLC, NMR, and MS analysis.
